# Supplementary material for: MOF-Derived Co and Fe Species Loaded on N-Doped Carbon Networks as Efficient Oxygen Electrocatalysts for Zn-Air Batteries
Source: PubMed Central journal article supplement (PMC9372253; doi:10.1007/s40820-022-00890-w), 2022-08-11
Supplement: 40820_2022_890_MOESM1_ESM.pdf [file 40820_2022_890_MOESM1_ESM.pdf]

Supporting Information for

## MOF-Derived Co and Fe Species Loaded on N-Doped Carbon Networks as Efficient Oxygen Electrocatalysts for Zn-Air Batteries

Yuanyuan Xue<sup>1</sup>, Yibo Guo<sup>1</sup>, Qinming Zhang<sup>1</sup>, Zhaojun Xie<sup>1,\*</sup>, Jinping Wei<sup>1</sup>, and Zhen Zhou<sup>2,\*</sup>

<sup>1</sup> School of Materials Science and Engineering, Institute of New Energy Material Chemistry, Key Laboratory of Advanced Energy Materials Chemistry (Ministry of Education), Renewable Energy Conversion and Storage Center (ReCast), Nankai University, Tianjin 300350, People's Republic of China

<sup>2</sup> School of Chemical Engineering, Zhengzhou University, Zhengzhou 450001, People's Republic of China

\*Corresponding authors. E-mail: [zjxie@nankai.edu.cn](mailto:zjxie@nankai.edu.cn) (Zhaojun Xie), [zhengzhou@zzu.edu.cn](mailto:zhengzhou@zzu.edu.cn) (Zhen Zhou)

### Supplementary Figures and Tables

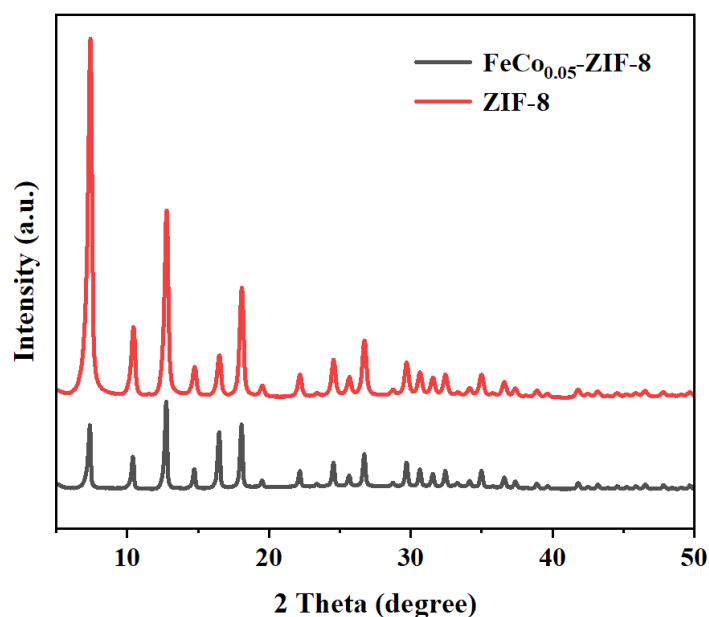

**Fig. S1** XRD patterns of FeCo<sub>0.05</sub>-ZIF-8 and ZIF-8

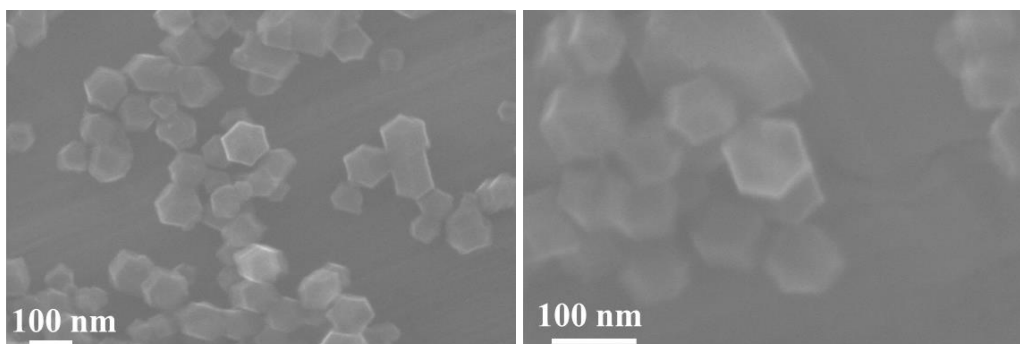

**Fig. S2** SEM images of FeNC

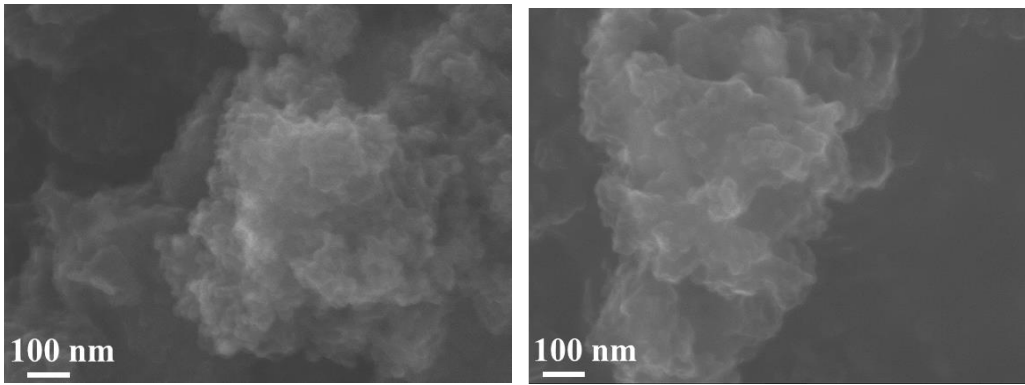

Fig. S3 SEM images of CoNP@NC

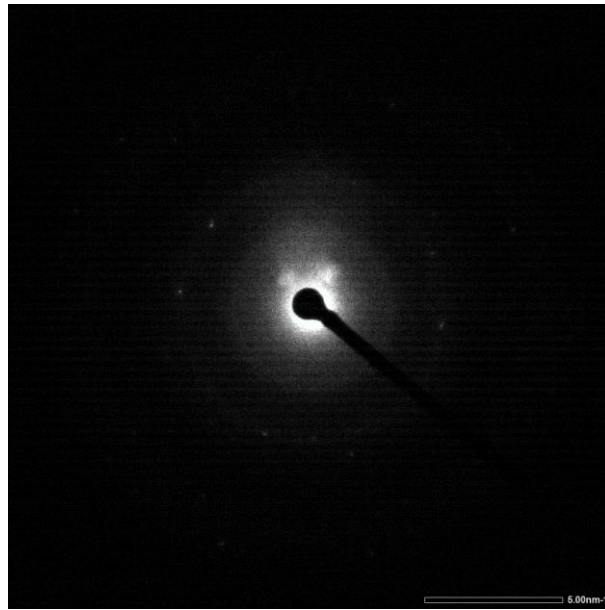

Fig. S4 SAED image of CoNP@FeNC-0.05

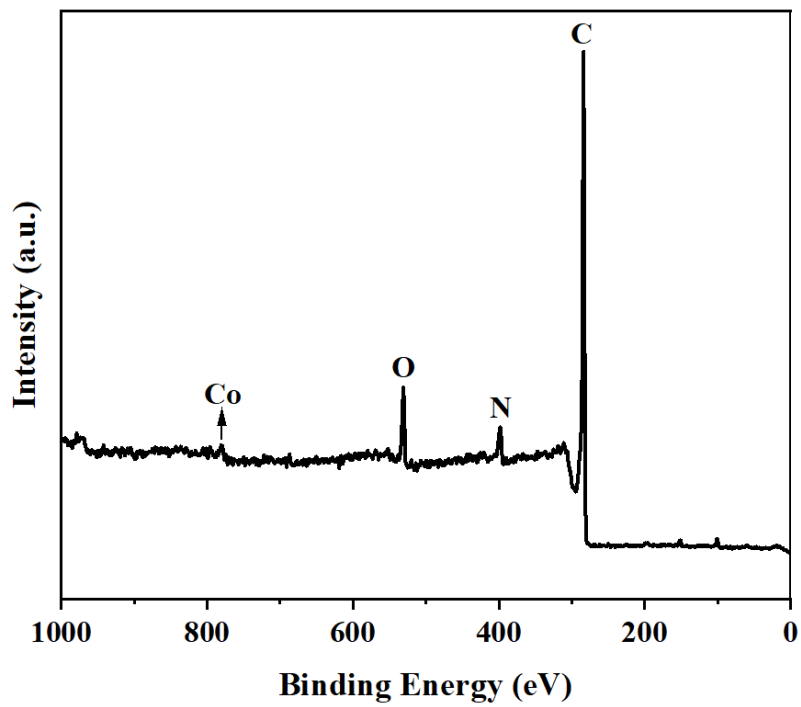

Fig. S5 XPS survey spectrum of CoNP@FeNC-0.05

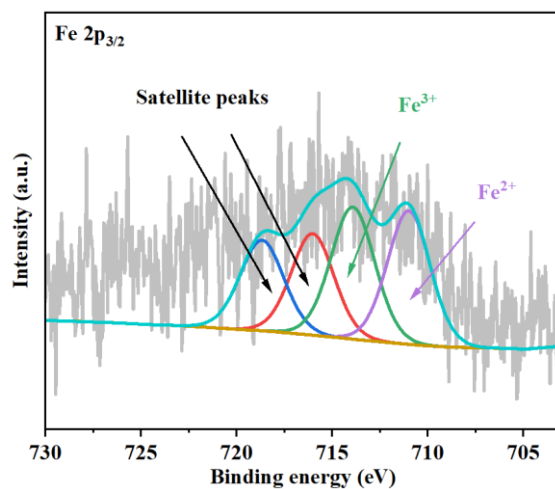

**Fig. S6** High-resolution Fe 2p XPS of CoNP@FeNC-0.05

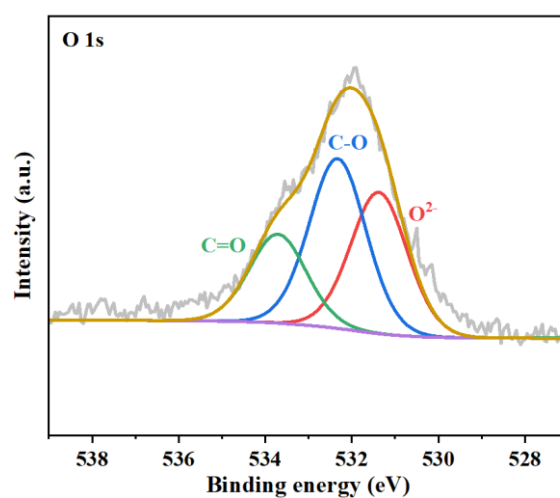

**Fig. S7** High-resolution O 1s XPS of CoNP@FeNC-0.05

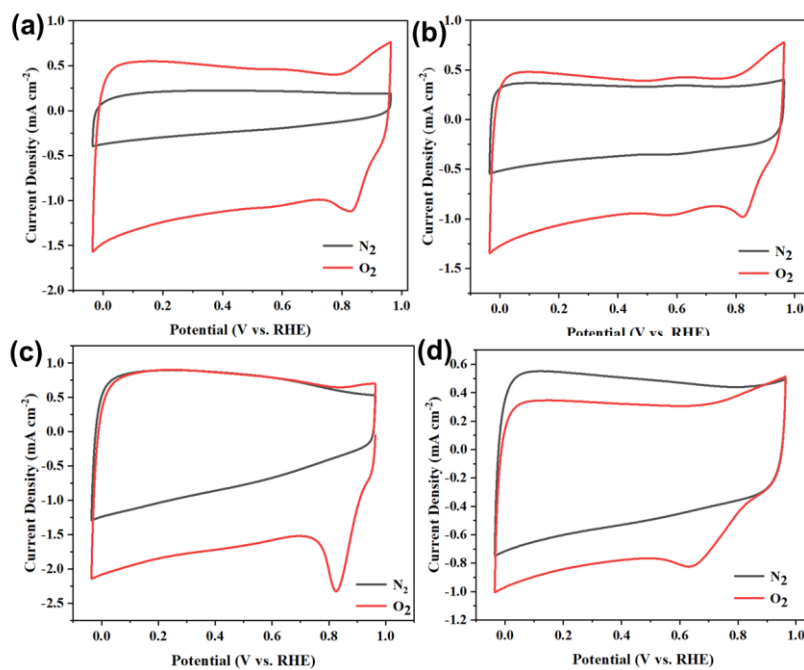

**Fig. S8** CV curves of (a) CoNP@FeNC-0.05, (b) CoNP@NC, (c) FeNC, (d) NC under N<sub>2</sub> or O<sub>2</sub> saturated 0.1 M KOH for ORR

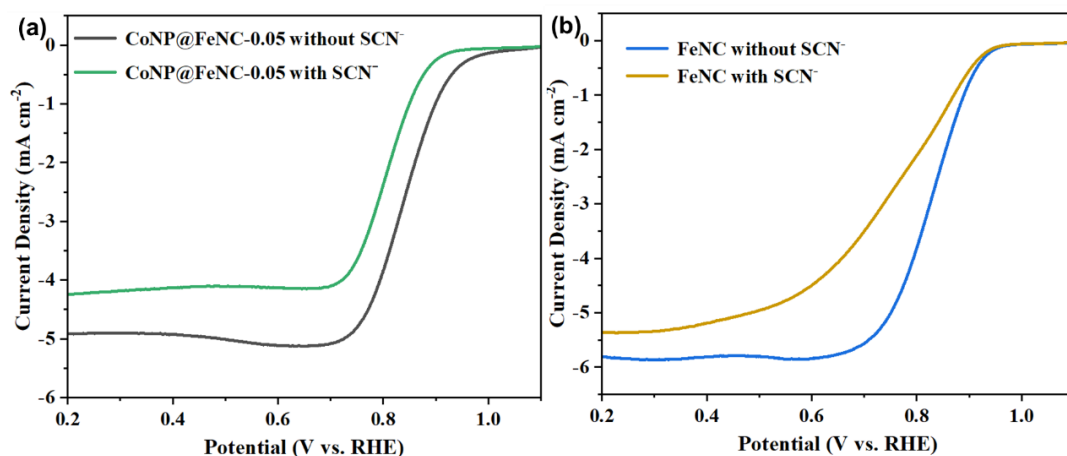

**Fig. S9** LSV curves of catalysts for OER under 0.1 M KOH, measured before and after adding  $\text{SCN}^-$  (0.1 M)

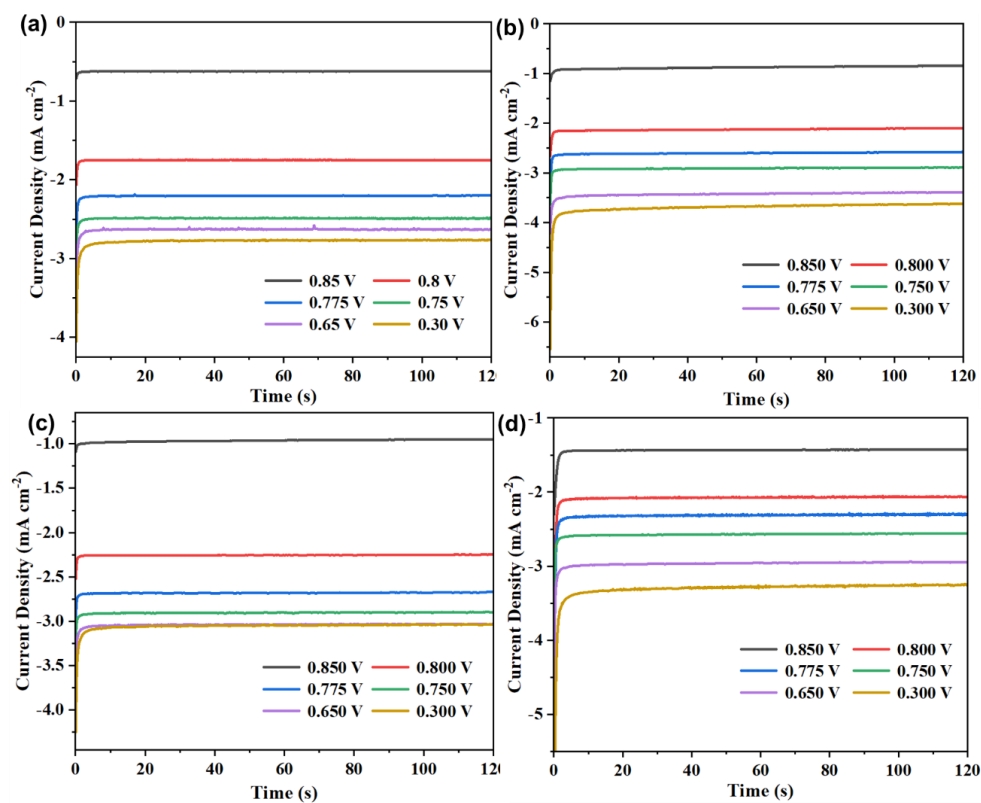

**Fig. S10** The *i-t* curves of (a) CoNP@FeNC-0.05, (b) Pt/C, (c) CoNP@NC, and (d) FeNC, under 0.1 M KOH, with a rotation speed of 800 rpm

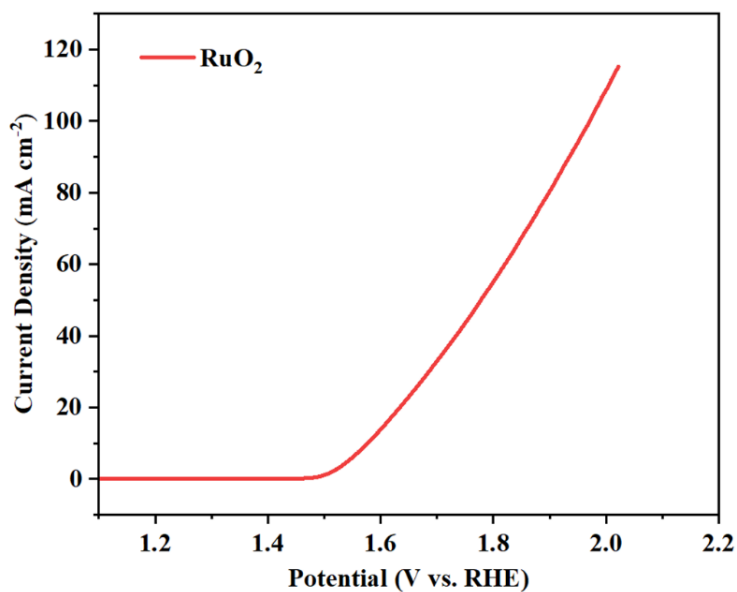

**Fig. S11** LSV curve of RuO<sub>2</sub> catalyst for OER with a scan rate of 5 mV s<sup>-1</sup> under 1 M KOH, at 1600 rpm

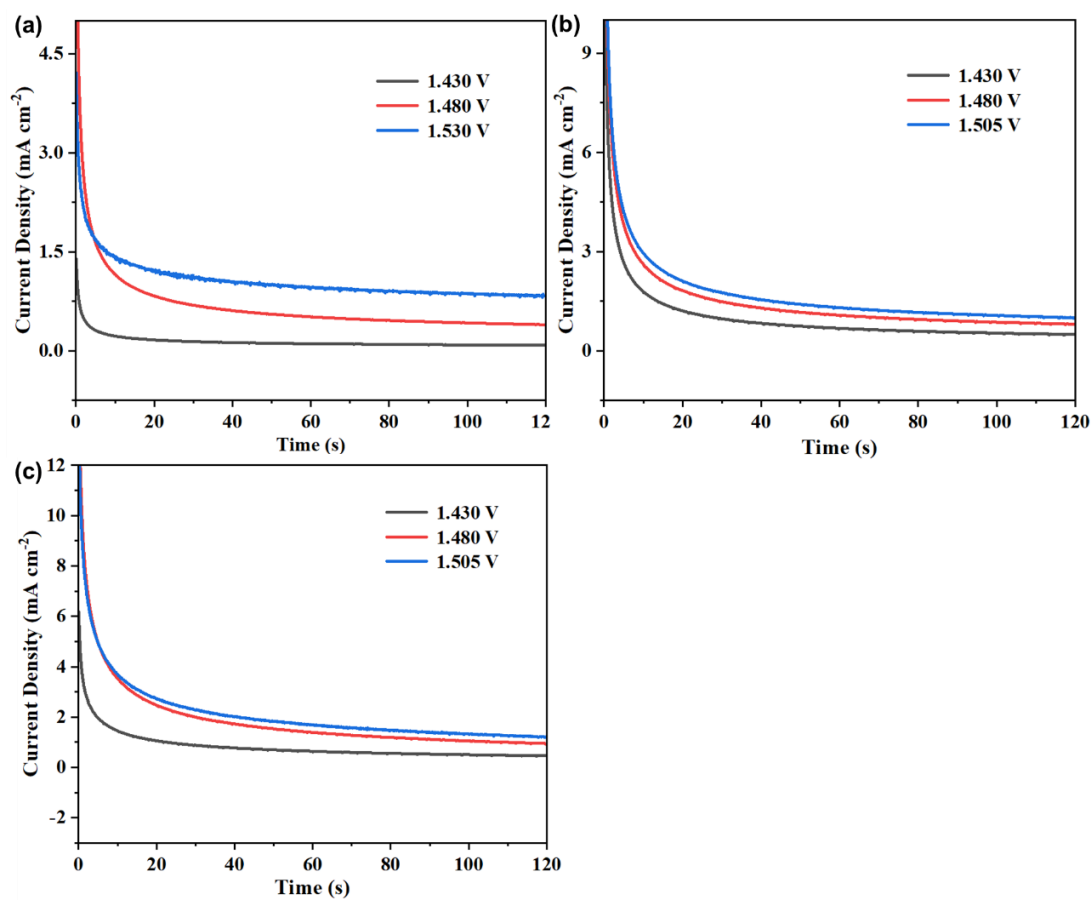

**Fig. S12** The i-t curves of (a) CoNP@FeNC-0.05, (b) CoNP@NC, and (c) FeNC, under 1 M KOH, with a rotation speed of 800 rpm

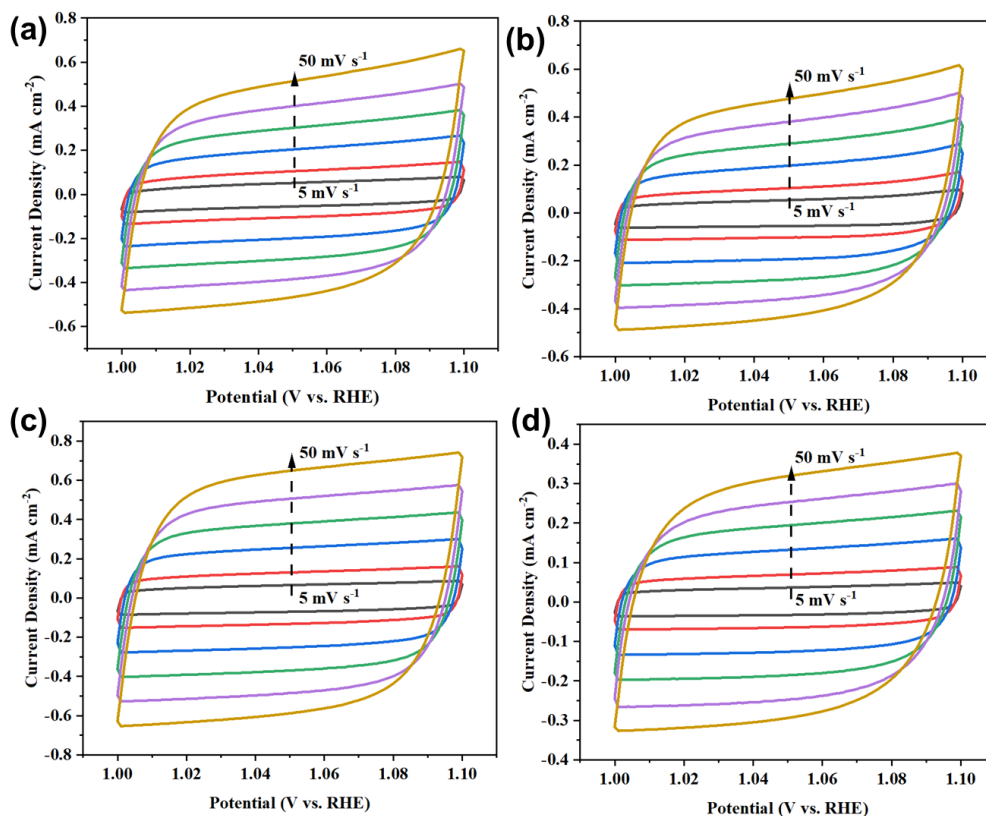

**Fig. S13** CV curves at various scan rates within a potential window from 1.0 to 1.1 V vs. RHE without Faradaic processes: (a) CoNP@FeNC-0.05, (b) CoNP@NC, (c) FeNC, and (d) NC

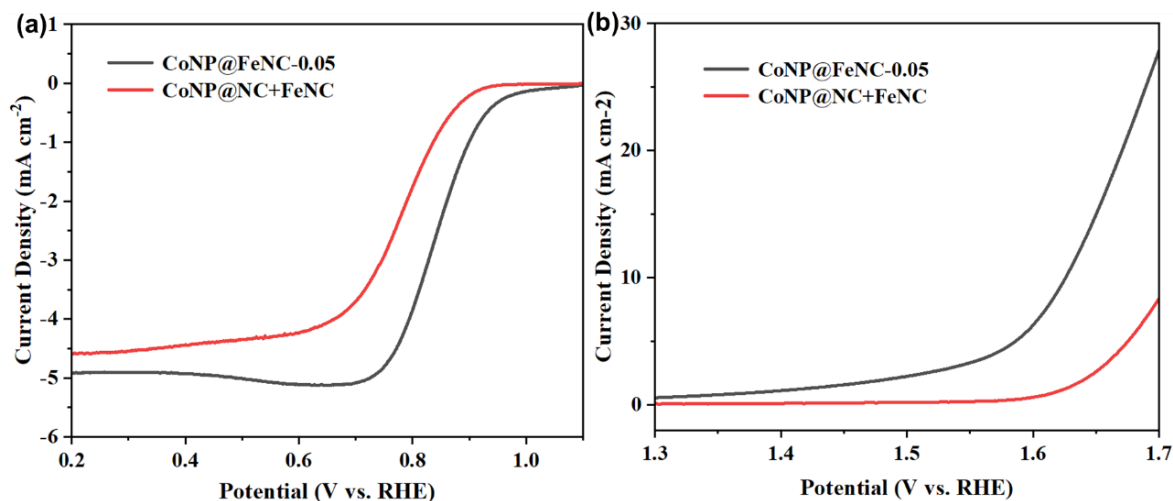

**Fig. S14** (a) LSV curves of CoNP@FeNC-0.05 and CoNP@NC+FeNC for ORR under 0.1 M KOH. (b) LSV curves of CoNP@FeNC-0.05 and CoNP@NC+FeNC for OER under 1 M KOH

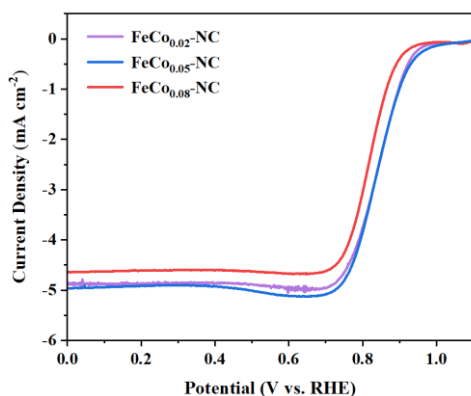

**Fig. S15** LSV curves of CoNP@FeNC catalysts for ORR with a scan rate of 5 mV s<sup>-1</sup> under 0.1 M KOH, at 1600 rpm

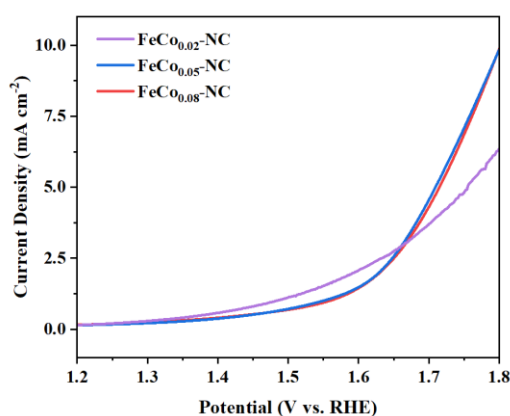

**Fig. S16** LSV curves of CoNP@FeNC catalysts for OER with a scan rate of 5 mV s<sup>-1</sup> under 1 M KOH, at 1600 rpm

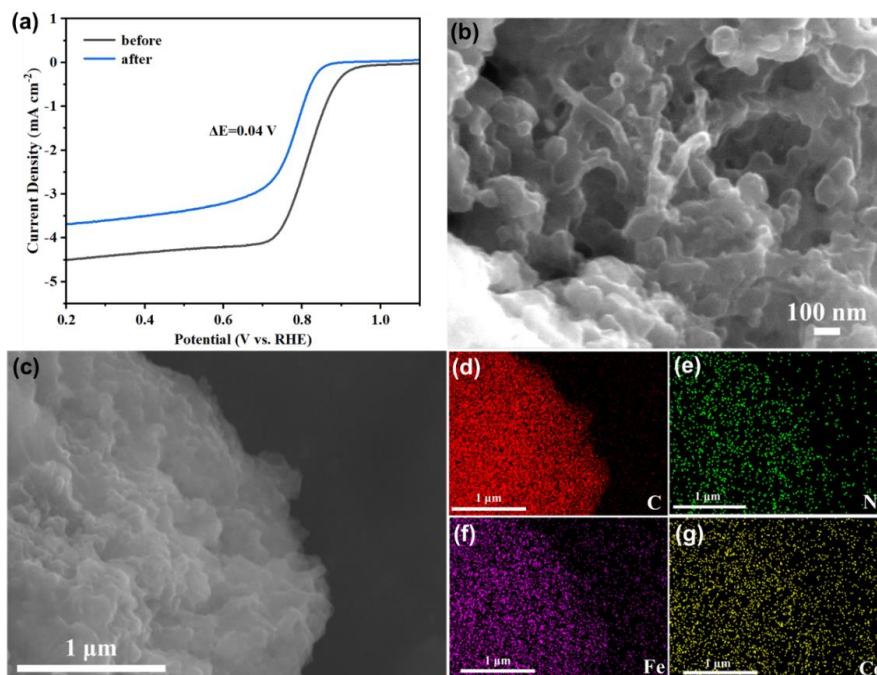

**Fig. S17** (a) LSV curves of CoNP@FeNC-0.05 for ORR, before and after CV tests of 5000 cycles under 0.1 M KOH. (b) SEM image of CoNP@FeNC-0.05 after CV tests of 5000 cycles. (c-g) SEM image and corresponding EDS mapping of CoNP@FeNC-0.05 after CV tests of 5000 cycles

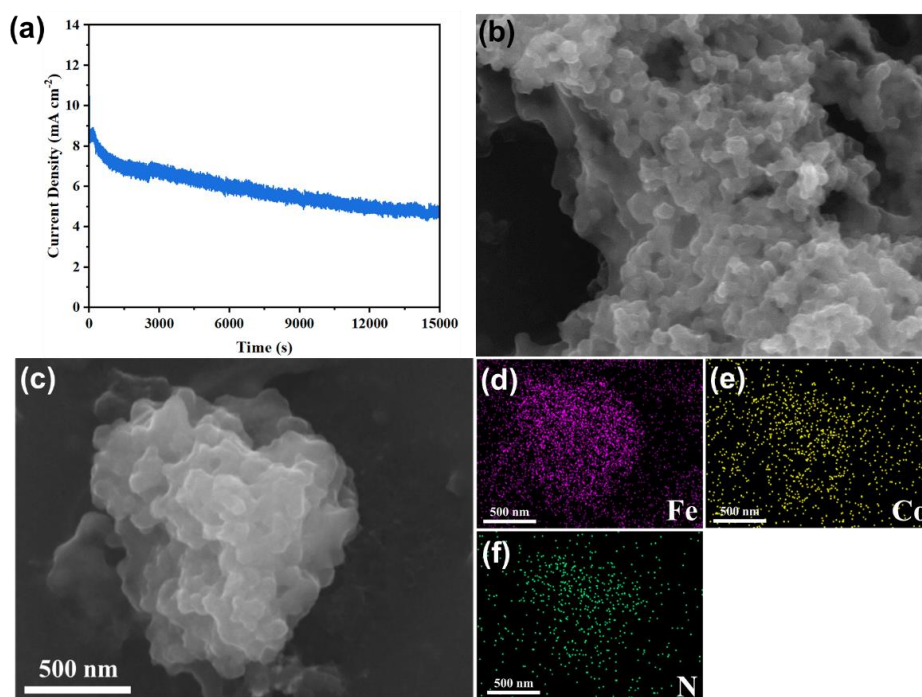

**Fig. S18** (a) The i-t curve of CoNP@FeNC-0.05 for OER at 1.67 V under 1 M KOH. (b) SEM image of CoNP@FeNC-0.05 after 15000-s reaction. (c-f) SEM image and corresponding EDS mapping of CoNP@FeNC-0.05 after 15000-s reaction. The distribution of carbon is not offered since CoNP@FeNC-0.05 was loaded on carbon paper under durability tests

**Table S1** The element contents of prepared catalysts from ICP-OES tests

|          | FeNC | CoNP@NC | CoNP@FeNC-0.05 |
|----------|------|---------|----------------|
| Fe (wt%) | 1.05 | -       | 1.04           |
| Co (wt%) | -    | 1.82    | 4.02           |

**Table S2** The element contents of prepared catalysts from XPS tests

|          | FeNC  | CoNP@NC | CoNP@FeNC-0.05 |
|----------|-------|---------|----------------|
| Fe (wt%) | 1.46  | -       | 1.41           |
| Co (wt%) | -     | 2.45    | 1.87           |
| C (wt%)  | 83.33 | 85.11   | 82.00          |
| O (wt%)  | 8.08  | 6.82    | 8.38           |
| N (wt%)  | 7.13  | 5.62    | 6.33           |



**Table S3** Comparisons of ORR performance (vs. RHE) of CoNP@FeNC-0.05 with control catalysts in 0.1 M KOH

|                                                             | NC   | CoNP@NC | FeNC | CoNP@FeNC-0.05 | Pt/C |
|-------------------------------------------------------------|------|---------|------|----------------|------|
| <b>Half-wave potential (V)</b>                              | 0.68 | 0.82    | 0.83 | 0.85           | 0.82 |
| <b>Onset potential<br/>(at -0.1 mA cm<sup>-2</sup>) (V)</b> | 0.85 | 0.95    | 0.96 | 1.02           | 0.98 |

**Table S4** Comparison of ORR performance (vs. RHE) of CoNP@FeNC-0.05 with reported related catalysts in 0.1 M KO

| Catalysts                                  | Half-wave potential (V) | Onset potential (V) | Scan rate (mV s <sup>-1</sup> ) | Rotation rate (rpm) | Refs.                                              |
|--------------------------------------------|-------------------------|---------------------|---------------------------------|---------------------|----------------------------------------------------|
| CoNP@FeNC-0.05                             | 0.85                    | 1.02                | 5                               | 1600                | <b>This work</b>                                   |
| FeCo-N-HCN                                 | 0.86                    | 0.98                | -                               | 1600                | Adv. Funct. Mater. 2021, 31, 2011289.              |
| Co-NHC-900                                 | 0.85                    | -                   | 10                              | 1600                | ACS Appl. Mater. Interfaces 2017, 9, 38499-38506.  |
| PPy/FeTCPP/Co                              | 0.86                    | 1.01                | 10                              | 1600                | Adv. Funct. Mater. 2017, 27, 1606497.              |
| Fe <sub>3</sub> Co <sub>2</sub> N-CNP(0.3) | 0.875                   | 0.979               | -                               | 1600                | ACS Appl. Mater. Interfaces 2018, 10, 12651-12658. |
| Fe <sub>3</sub> C-Co/NC                    | 0.885                   | -                   | 10                              | 1600                | Adv. Funct. Mater. 2019, 29, 1901949.              |
| COF@ZIF <sub>800</sub>                     | 0.85                    | 0.99                | -                               | 1600                | J. Mater. Chem. A 2022, 10, 228-233.               |
| Co@NPC/C-MWCNTs                            | 0.79                    | 0.87                | 10                              | 1600                | Chem. Eng. J. 2022, 432, 134192.                   |
| CoNC-CNF-1000                              | 0.8                     | -                   | 10                              | 1600                | Small 2018, 14, 1800423.                           |
| Fe/Meso-NC-1000                            | 0.885                   | 0.97                | 5                               | 1600                | Adv. Mater. 2022, 34, 2107291.                     |
| Fe/N/S-PCNT                                | 0.84                    | 0.96                | 10                              | 1600                | J. Mater. Chem. A 2019, 7, 1607-1615.              |
| Co-SAs@NC                                  | 0.82                    | 0.96                | 5                               | 1600                | Angew. Chem. Int. Ed. 2019, 58, 5359-5364.         |
| Co-N <sub>3</sub> C <sub>1</sub> @GC       | 0.846                   | 0.904               | 10                              | 1600                | ACS Catal. 2020, 10, 5862-5870.                    |
| Fe <sub>1</sub> -HNC-500-850               | 0.842                   | 0.93                | 5                               | -                   | Adv. Mater. 2020, 32, 1906905.                     |

**Table S5** Comparison of OER performance of CoNP@FeNC-0.05 with reported related catalysts (vs. RHE)

| Catalysts               | Potential at $j=10$ $\text{mA cm}^{-2}$ (V) | Electrolyte | Scan rate ( $\text{mV s}^{-1}$ ) | Rotation rate (rpm) | Refs.                                            |
|-------------------------|---------------------------------------------|-------------|----------------------------------|---------------------|--------------------------------------------------|
| CoNP@FeNC-0.05          | 1.63                                        | 1 M KOH     | 5                                | 1600                | <b>This work</b>                                 |
| Fe <sub>3</sub> C-Co/NC | 1.57                                        | 1 M KOH     | 5                                | -                   | Adv. Funct. Mater. 2019, 29, 1901949.            |
| CF-NG-Co                | 1.63                                        | 1 M KOH     | 5                                | 1600                | J. Mater. Chem. A 2018, 6, 489-497.              |
| PPy/FeTCPP/Co           | 1.61                                        | 0.1 M KOH   | 10                               | 1600                | Adv. Funct. Mater. 2017, 27, 1606497.            |
| CoO@Co/N-rGO            | 1.65                                        | 0.1 M KOH   | 5                                | 1600                | J. Mater. Chem. A 2017, 5, 5865-5872.            |
| Co/N-C-800              | 1.504                                       | 1 M KOH     | 10                               | -                   | ACS Appl. Mater. Interfaces 2022, 14, 8549-8556. |
| CoN-HPCNF-900           | 1.63                                        | 0.1 M KOH   | 5                                | -                   | Chem. Eng. J. 2021, 407, 127157.                 |
| Co/NGC-3                | 1.626                                       | 0.1 M KOH   | 5                                | 1600                | ACS Appl. Mater. Interfaces 2020, 12, 5717-5729. |
| CoNC-CNF-1000           | 1.68                                        | 0.1 M KOH   | 10                               | 1600                | Small 2018, 14, 1800423.                         |
| CoFe/Co@NCNT/NG         | 1.611                                       | 0.1 M KOH   | 10                               | 1600                | J. Power Sources 2020, 449, 227512.              |
| Co@NHCC-800             | 1.512                                       | 1 M KOH     | 10                               | -                   | Appl. Catal. B 2019, 254, 55-65.                 |
| Co/N-CNTs (1500 sccm)   | 1.54                                        | 1 M KOH     | 5                                | 1600                | Small 2020, 16, 2002427.                         |
| Co@CNT-NC               | 1.633                                       | 0.1 M KOH   | 10                               | -                   | J. Power Sources 2022, 527, 231205.              |

**Table S6** Comparison of performance of Zn-air batteries of CoNP@FeNC-0.05 with reported related results.

| Catalysts       | Open-circuit potential (V) | Maximum Power density ( $\text{mW cm}^{-2}$ ) | Cycling stability                                  | Refs.                                      |
|-----------------|----------------------------|-----------------------------------------------|----------------------------------------------------|--------------------------------------------|
| CoNP@FeNC-0.05  | 1.51                       | 104.4                                         | 500 cycles (60 min/cycle) @ 5 $\text{mA cm}^{-2}$  | <b>This work</b>                           |
| CoNi-SAs/NC     | 1.45                       | 101.4                                         | 95 cycles (20 min/cycle) @ 5 $\text{mA cm}^{-2}$   | Adv. Mater. 2019, 31, 1905622.             |
| FeCo-DACs/NC    | 1.50                       | 175                                           | 480 cycles (30 min/cycle) @ 10 $\text{mA cm}^{-2}$ | Adv. Mater. 2022, 34, 2107421.             |
| (Fe,Co)-SA/CS   | 1.43                       | 86.65                                         | 300 cycles (20 min/cycle) @ 5 $\text{mA cm}^{-2}$  | Small Methods 2021, 5, 2000751.            |
| Fe/Co-N/S-Cs    | 1.395                      | 102.63                                        | 80 cycles (20 min/cycle) @ 5 $\text{mA cm}^{-2}$   | Appl. Catal. B 2019, 241, 95-103.          |
| Fe-N4 SAs/NPC   | -                          | 232                                           | 108 cycles (20 min/cycle) @ 2 $\text{mA cm}^{-2}$  | Angew. Chem. Int. Ed. 2018, 57, 8614-8618. |
| FeNx/C-700-20   | 1.6                        | 36                                            | -                                                  | Adv. Energy Mater. 2018, 8, 1800955.       |
| SAFe-SWCNT film | 1.47                       | 210                                           | -                                                  | Appl. Catal. B 2021, 294, 120239.          |

## Nano-Micro Letters

---

|                                               |       |       |                                                       |                                              |
|-----------------------------------------------|-------|-------|-------------------------------------------------------|----------------------------------------------|
| Fe/N-G-SAC                                    | -     | 120   | 240 cycles (60 min/cycle)<br>@ 10 mA cm <sup>-2</sup> | Adv. Mater. 2020,<br>32, 2004900.            |
| CoNC-NB2                                      | 1.50  | 246   | 420 cycles (20 min/cycle)<br>@ 2 mA cm <sup>-2</sup>  | Small 2020, 16,<br>2001171.                  |
| CNT@SAC-<br>Co/NCP                            | 1.45  | 172   | 100 cycles (20 min/cycle)<br>@ 5 mA cm <sup>-2</sup>  | Adv. Funct. Mater.<br>2021, 31,<br>2103360.  |
| H-<br>Co@FeCo/N/C                             | 1.45  | 125.2 | 400 cycles (30 min/cycle)<br>@ 10 mA cm <sup>-2</sup> | Appl. Catal. B<br>2020, 278,<br>119259.      |
| Co@hNCTs-<br>800                              | 1.45  | 149   | 3000 cycles (10 min/cycle)<br>@ 5 mA cm <sup>-2</sup> | Nano Energy<br>2020, 71, 104592.             |
| Co@Co <sub>3</sub> O <sub>4</sub> @N<br>C-900 | 0.842 | 64    | 100 cycles (120 min/cycle)<br>@ 5 mA cm <sup>-2</sup> | J. Mater. Chem. A<br>2018, 6, 1443-<br>1453. |

---
